# Supplementary material for: A Preliminary Investigation of Brain Cannabinoid Receptor Type 1 (CB1R) Availability in Men with Opioid Use Disorder
Source: Research Square preprint supplement (doi:10.21203/rs.3.rs-7715611/v1), 2025-10-14
Supplement: Supplementary file 1 [file 78fec3520b9812388c39dbb0.docx]

**Supplementary materials to “A Preliminary Investigation of Brain Cannabinoid Receptor Type 1 (CB1R) Availability in Men with Opioid Use Disorder”**

Table S1: The participants’ reasons for antidepressant use based on the SCID interview

| No. | Reason for antidepressant use |
| --- | --- |
| 1 | Past major depressive disorder |
| 2 | Past adjustment disorder with depressed mood |
| 3 | Past panic disorder |
| 4 | Stimulant craving control |
| 5 | Past major depressive episode + current residual symptoms |
| 6 | Past major depressive disorder |

Table S2: The results of LMM, including age as a covariate

|  | F | p |
| --- | --- | --- |
| Group | *F*(1,25)= *3*.6 | 0.0695 |
| Region | *F*(12,312)= 96.29 | <.0001 |
| Group*Region | *F*(12,312)= 2.42 | 0.0052 |
| Age | *F*(1,25)= 1.14 | 0.2955 |

Table S3: The results of LMM estimating the effect of OAT type (methadone versus buprenorphine) within the OUD group

|  | F | p |
| --- | --- | --- |
| OAT Type | *F*(1,8)=0.52 | 0.4917 |
| Region | *F*(12,96)=30.92 | <.0001 |
| OAT Type*Region | *F*(12,96)=1.14 | 0.335 |

Table S4: The results of LMM estimating the effect of antidepressant use within the OUD group

|  | F | p |
| --- | --- | --- |
| Antidepressant | *F*(1,8)=1.23 | 0.299 |
| Region | *F*(12,96)=10.30 | <.0001 |
| Antidepressant*Region | *F*(12,96)=1.20 | 0.293 |
